# Supplementary material for: Professional Curiosity Counts in Higher Education: Multi-dimensional Associations among Undergraduates’ Professional Curiosity, Self-Efficacy and Learning Outcomes
Source: Research Square preprint supplement (doi:10.21203/rs.3.rs-7053174/v1), 2025-11-05
Supplement: Supplementary file 1 [file 8f6ad881d2c54d2816652691.docx]

# Summary of key constructs and their measures

| Variable | Factor Loadings | Items |
| --- | --- | --- |
| Professional Interest-type Curiosity | 0.98 | I view challenging situations in learning major-related knowledge and skills as opportunities to grow and learn |
| 0.98 | I am always looking for experiences in major education that challenge how I think about myself and the world. |
| 0.83 | I find it fascinating to learn new information in major education. |
| Professional Deprivation-type Curiosity | 0.72 | Thinking about solutions to difficult conceptual problems in major-related knowledge can keep me awake at night. |
| 0.89 | I can spend hours on a single major-related problem because I just can’t rest without knowing the answer. |
| 0.85 | I feel frustrated if I can’t figure out the solution to a major-related problem, so I work even harder to solve it. |
| Professional Self-Efficacy | 0.85 | Compared with others in my major, I think I'm a good student. |
| 0.87 | I am sure I can do an excellent job on the problems and tasks assigned for my major. |
| 0.93 | I think I will receive a good grade in my major. |
| 0.96 | My study skills are excellent compared with others in my major. |
| 0.92 | Compared with other students in this class I think I know a great deal about my major. |
| Learning  Engagement | 0.77 | Time flies when I’m learning major-related knowledge or skills. |
| 0.88 | When learning major-related knowledge or skills, I am bursting with energy. |
| 0.93 | I am enthusiastic about my studies in major. |
| 0.72 | When learning major-related knowledge or skills, I forget any other things. |
| Learning Burnout | 0.84 | I feel a lack of motivation in my studies in my major and often think of giving up. |
| 0.76 | I often have feelings of inadequacy in learning my major. |
| 0.71 | I often sleep badly because of matters related to my studies in major. |
| 0.92 | I feel that I am losing interest in learning my major. |
| 0.90 | I’m continually wondering whether my studies in major have any meaning. |
| 0.91 | I feel I have less and less to give at my studies in major. |
| 0.77 | The pressure of my studies in major causes me problems in my close relationships with others. |
| Socioeconomic  Status | 0.82 | Father's highest education. |
| 0.94 | Mother's highest education. |
